# Supplementary material for: Reduction in the copy number and expression level of the recurrent human papillomavirus integration gene fragile histidine triad (FHIT) predicts the transition of cervical lesions
Source: PubMed Central journal article supplement (PMC5393568; doi:10.1371/journal.pone.0175520), 2017-04-17
Supplement: pone.0175520.s001.pdf [file pone.0175520.s001.pdf]

### 1.DIPS-PCR primers of HPV16

|                          |                             |
|--------------------------|-----------------------------|
| HPV16-1 first round      | GGGATGTAATGGATGGTTTTATGT    |
| HPV16-2 first round      | GGCGCCATGAGACTGAAACACC      |
| HPV16-3 first round      | GCCAGAATGGATACAAAGACAAACA   |
| HPV16-4 first round      | TTTGCACGAGGACGAGGACA        |
| HPV16-5 first round      | AGAGCCAGACACCGGAAACC        |
| HPV16-rev-1 first round  | ACACAACAAACAACACTAATTCAACAT |
| HPV16-rev-2 first round  | GCACCAAAGCCAGTATGAACC       |
| HPV16-rev-3 first round  | AGCACCTATAGATTTTCCACTACGAG  |
| HPV16-rev-4 first round  | AAGTTGGGTAGCCGATGCAC        |
| HPV16-1 second round     | GGGATGCTATATCAGATGACGAGAACG |
| HPV16-2 second round     | GTGGAAGTGGGGGTGGTTGC        |
| HPV16-3 second round     | GGTACAATGGGCCTACGATAATGA    |
| HPV16-4 second round     | ACGAGGACAAGGAAAACGATGGAGA   |
| HPV16-5 second round     | GAAACCCCTGCCACACCACT        |
| HPV16-rev-1 second round | TGAGGTGGTGGGTGTAGCTTT       |
| HPV16-rev-2 second round | AATGGTGGACAATCACCTGGA       |
| HPV16-rev-3 second round | AATGCCAGTACGCCTAGAGGTT      |
| HPV16-rev-4 second round | CAGAACGTTTGTGTCGCATTG       |

### 1.DIPS-PCR primers of HPV18

|                         |                              |
|-------------------------|------------------------------|
| HPV18-1 first round     | CAGAAGGTACAGACGGGGAGG        |
| HPV18-2 first round     | TAGACAACGGGGGCACAGAGG        |
| HPV18-3 first round     | CACCAAATTGCGAAGTAGTGT        |
| HPV18-4 first round     | AGGAAGAGGAAGATGCAGACACC      |
| HPV18-5 first round     | CCTACAGGCAACAACAAAAGACG      |
| HPV18-rev-1 first round | TCCAGTATCTACCATATCACCATCTTCC |
| HPV18-rev-2 first round | TAGTGTCCACAGGCTCAAAGG        |
| HPV18-rev-3 first round | TGGAAATAGACACAGAGGTAGACGAAG  |

|                          |                               |
|--------------------------|-------------------------------|
| HPV18-rev-4 first round  | AGGGGACGTTATTACCACAATATACAC   |
| HPV18-1 second round     | GGGTTGTAACGGCTGGTTTTATGT      |
| HPV18-2 second round     | GGGCACAGAGGGCAACAACA          |
| HPV18-3 second round     | AATGGGAGACACACCTGAGTGGATACA   |
| HPV18-4 second round     | AGATGCAGACACCGAAGGAAACCC      |
| HPV18-5 second round     | AGGCAACAACAAAAGACGGAAACT      |
| HPV18-rev-1 second round | ATCTACCATATCACCATCTTCCAAAACCT |
| HPV18-rev-2 second round | GAGGATGGACGTGTAAGAAACTCAGG    |
| HPV18-rev-3 second round | ATCAAACCCAGACGTGCCAGTAAA      |
| HPV18-rev-4 second round | TACAGACAGATGGCAAAAAGCGG       |

## 2. The primers used in the formation of Sau3AI-specific adapters

|           |                                                  |
|-----------|--------------------------------------------------|
| AL1       | GGCCATCAGTCAGCAGTCGTAGCCGGATCCAGACTT<br>ACACGTTG |
| AP1       | GGCCATCAGTCAGCAGTCGTAG                           |
| AS-Sau3AI | GATCCAACGTGTAAGTCTG-NH <sub>2</sub>              |
